# Supplementary material for: Investigating the relationship between volumetransport and sea surface height in a numericalocean model
Source: Copernicus journal article supplement (doi:10.5194/os-2018-117), 2018-11-12
Supplement: Supplementary file [file os-2018-117-AC2-supplement.pdf]

1 Investigating the relationship between volume  
2 transport and sea surface height in a numerical  
3 ocean model

4 Estee Vermeulen <sup>1,2\*</sup>, Björn Backeberg <sup>2,3,4</sup>, Juliet Hermes <sup>1,5</sup>, Shane Elipot <sup>6</sup>

5 <sup>1</sup> *Department of Oceanography, University of Cape Town, Rondebosch, South Africa*

6 <sup>2</sup> *Nansen-Tutu Centre for Marine Environmental Research, University of Cape Town, South  
7 Africa*

8 <sup>3</sup> *CSIR, Coastal Systems Research Group, Stellenbosch, South Africa*

9 <sup>4</sup> *Nansen Environmental and Remote Sensing Centre, Bergen, Norway*

10 <sup>5</sup> *South African Environmental Observation Network, Egagasini Node, Cape Town, South  
11 Africa*

12 <sup>6</sup> *Rosenstiel School of Marine and Atmospheric Science, University of Miami, 4600  
13 Rickenbacker Causeway, Miami, FL 33149*

14 *\*Corresponding author address: Estee Vermeulen, Department of Oceanography, University of  
15 Cape Town, Rondebosch, South Africa*

16 *Email: [esteever01@gmail.com](mailto:esteever01@gmail.com)*

## 17 Abstract

18 The Agulhas Current Time-series mooring array (ACT) measured transport of the Agulhas  
19 Current at 34°S for a period of 3 years. Using along-track satellite altimetry data directly  
20 above the array, a proxy of Agulhas Current transport was developed based on the relationship  
21 between cross-current sea surface height (SSH) gradients and the measured transports. In this  
22 study, the robustness of the proxy is tested within a numerical modelling framework, using a  
23 34-year long regional-hindcast simulation from the Hybrid Coordinate Ocean Model (HYCOM).  
24 The model specifically tested the sensitivity of the transport proxy to (1) changes in the vertical  
25 structure of the current and to (2) different sampling periods used to calculate the proxy. Two  
26 reference proxies were created using HYCOM data from 2010-2013, by extracting model data  
27 at the mooring positions and along the satellite altimeter track for; the box (net) transport  
28 and the jet (southwestward) transport. Sensitivity tests were performed where the proxy was  
29 recalculated from HYCOM for (1) a period where the modelled vertical stratification was dif-  
30 ferent compared to the reference proxy, and (2) different lengths of time periods: 1, 3, 6, 12, 18  
31 and 34 years. Compared to the simulated (native) transports, it was found that the HYCOM  
32 proxy was more capable of estimating the box transport of the Agulhas Current compared to  
33 the jet transport. This was because the model is unable to resolve the dynamics associated with  
34 meander events, for which the jet algorithm was developed. The HYCOM configuration in this  
35 study contained exaggerated levels of offshore variability in the form of frequently-impinging  
36 baroclinic anticyclonic eddies. These eddies consequently broke down the linear relationship  
37 between SSH slope and vertically-integrated transport. Lastly, results showed that calculating  
38 the proxy over shorter or longer time periods in the model did not significantly impact the skill  
39 of the Agulhas transport proxy, suggesting that 3-years was a sufficiently long time-period for  
40 the observation based transport proxy. These results were consistent to a previous study that  
41 was used to design the ACT mooring array and therefore supports research methods needed to  
42 develop future monitoring programs of the Agulhas Current System.

## 43 1 Introduction

44 The Agulhas Current System is the strongest western boundary current in the Southern  
45 Hemisphere and transports warm tropical water southward along the east coast of South  
46 Africa [Lutjeharms, 2006]. The Agulhas Current, in the northern region, is known for  
47 its narrow, fast, flow conditions following the steep continental slope [de Ruijter et al.,  
48 1999]. As the current continues southwestward it becomes increasingly unstable over  
49 the widening continental shelf until it eventually retroflects, forming an anticyclonic loop  
50 south of Africa and returning to the Indian Ocean as the eastward Agulhas Return Current  
51 [Beal et al., 2011; Biastoch and Krauss, 1999; Dijkstra and de Ruijter, 2001; Hermes  
52 et al., 2007; Lutjeharms, 2006; Loveday et al., 2014]. The anticyclonic loop, known as  
53 the Agulhas Retroflection, contains some of the highest levels of mesoscale variability  
54 in the global ocean [Gordon, 2003] in the form of Agulhas rings, eddies and filaments.  
55 These contribute to leakage from this region, contributing heat, salt and energy into the  
56 Benguela upwelling system, the Atlantic Ocean and the global overturning circulation  
57 system [Gordon et al., 1987; Beal et al., 2011; Durgadoo et al., 2013], impacting the  
58 Atlantic Meridional Overturning Circulation (AMOC) [Biastoch and Krauss, 1999; Beal  
59 et al., 2011; Durgadoo et al., 2013; Loveday et al., 2014]. In the regional context, the  
60 Agulhas Current has a major influence on the local weather systems, due to large latent  
61 and sensible heat fluxes, which contributes to rainfall and storm events over the adjacent  
62 land [Reason, 2001; Rouault et al., 2002; Rouault and Lutjeharms, 2003]. The unique  
63 circulation of the Agulhas Current System, in the context of regional and global climate  
64 variability, makes it an important field of research.

65 To understand the complicated dynamics of the Agulhas Current requires an integrated  
66 approach using numerical ocean models, satellite remote sensing measurements and *in situ*  
67 observations. Previous studies have suggested that measuring the dynamics of the Agulhas  
68 Current in the northern region is easier due to its stable trajectory and its confinement  
69 to the continental slope [van Sebille et al., 2010]. However, the close proximity of the  
70 current to the coast has made it difficult to monitor using satellite altimetry [Rouault  
71 et al., 2010]. Newer altimetry products dedicated to coastal areas are promising but are  
72 yet to be validated within the Agulhas Current region [Birol et al., 2017]. In addition,

73 the frequent disturbances of the current in the form of solitary meanders, also known as  
74 Natal Pulses, and its interactions with mesoscale features originating upstream and from  
75 the east [Elipot and Beal, 2015], remain poorly resolved in many numerical ocean models  
76 [Tsugawa and Hasumi, 2010; Braby et al., 2016], highlighting the challenges involved in  
77 monitoring and modelling the dynamics in this region.

78 There is a trade-off between spatial and temporal sampling. *In situ* mooring observa-  
79 tions provide high temporal observations of the Agulhas Current throughout the water  
80 column but are spatially coarse. In contrast, satellite observations can provide high spa-  
81 tial resolution data of the surface ocean but lacks detailed information below the surface.  
82 Hence, numerical models are needed to provide a temporally coherent, high resolution  
83 representation of the ocean throughout the water column. Numerous studies aiming to  
84 monitor long-term changes in global current systems have adopted methods to combine  
85 various sampling tools [eg. Maul et al. 1990; Imawaki et al. 2001; Andres et al. 2008; Zhu  
86 et al. 2004; Yan and Sun 2015], including the recent development of the Agulhas transport  
87 proxy established to monitor the interannual variability and long-term trends in Agulhas  
88 Current transport [Beal and Elipot, 2016].

89 Beal and Elipot [2016] have shown that a strong relationship exists between surface geo-  
90 strophic velocity and full-depth transport such that sea level anomalies can be used to  
91 study the variability and dynamics of the Agulhas Current System as has been demon-  
92 strated before [Fu et al., 2010; Rouault et al., 2010; Rouault and Penven, 2011; etc.].  
93 The 22-year transport proxy created by Beal and Elipot [2016] assumed a fixed linear  
94 relationship between *in situ* transport and sea surface slope based on *in situ* measure-  
95 ments over the 3-year sampling period of the Agulhas Current Time-series experiment  
96 (ACT) [Beal et al., 2015]. Analyses of the Agulhas Current transport proxy time-series  
97 concluded that the Agulhas Current has not intensified over the last two decades in re-  
98 sponse to intensified global winds under anthropogenic climate change [Cai, 2006; Yang  
99 et al., 2016], but instead has broadened as a result of increased eddy activity [Beal and  
100 Elipot, 2016] in agreement with Backeberg et al. [2012]. This could essentially decrease  
101 poleward heat transport and increase mixing over the continental shelf, thereby increasing  
102 cross-frontal exchange of nutrients and pollutants between the coastal ocean and the deep  
103 ocean [Backeberg et al., 2012; Beal and Elipot, 2016].

104 This modelling study recreates the Agulhas transport proxy developed by Beal and Elipot  
105 [2016], within a regional HYCOM simulation of the greater Agulhas Current System,  
106 aiming to test the sensitivity of using 3 years of *in situ* mooring data to develop a transport  
107 proxy as well as the sensitivity of the proxy to changes in the vertical structure of the  
108 Agulhas Current. The paper is structured as follows; Section 2 describes the data and  
109 methods, it should be noted that this section forms a key part of the paper as the methods  
110 of recreating the proxy are an integral component of the study. Section 3 presents the  
111 results from the HYCOM transport proxy and lastly Section 4 presents the summary and  
112 conclusions.

## 113 **2 Data and Methods**

### 114 **2.1 The Hybrid Coordinate Ocean Model**

115 The Hybrid Coordinate Ocean Model (HYCOM) is a primitive equation ocean model  
116 that was developed from the Miami Isopycnic Coordinate Ocean Model (MICOM) [Smith  
117 et al., 1990]. HYCOM combines the optimal features of isopycnic-coordinate and fixed-  
118 grid ocean circulation models into one framework [Bleck, 2002] and uses the hybrid layers  
119 to change the vertical coordinates depending on the stratification of the water column.  
120 The model makes a dynamically smooth transition between the vertical coordinate types  
121 via the continuity equation using the hybrid coordinate generator [Chassignet et al., 2007].  
122 Well-mixed surface layers use z-level coordinates,  $\rho$ -coordinates are utilized between the  
123 surface and bottom layers in a well-stratified ocean, and the bottom layers apply  $\sigma$ -  
124 coordinates following bottom topography. Adjusting the vertical spacing between the  
125 hybrid coordinate layers in HYCOM simplifies the numerical implementation of several  
126 physical processes without affecting the efficient vertical resolution, and thus combines  
127 the advantages of the different coordinate types in optimally simulating coastal and open-  
128 ocean circulation features [Chassignet et al., 2007].

129 This study used output from a one-way nested  $1/10^\circ$  model of the greater Agulhas Current  
130 System (AGULHAS) [Backeberg et al., 2008; 2009; 2014]. The regional nested model,  
131 AGULHAS, received boundary conditions from the basin-scale model of the Indian and  
132 Southern Ocean (INDIA) [George et al., 2010] every 6-hrs. The boundary conditions

133 were relaxed towards the outer model over a 20 grid cell sponge layer. The nested model  
134 covered the region from the Mozambique Channel to the Agulhas Retroflection region  
135 and the Agulhas Return Current, geographically extending from approximately 0°-60°  
136 East and from 10°-50° South, with a horizontal resolution of  $\sim 10$  km that adequately  
137 resolved mesoscale dynamics to the order of the first baroclinic Rossby radius estimated  
138 to be about 30 km [Chelton et al., 1998]. AGULHAS has 30 hybrid layers and targeted  
139 densities ranging from 23.6 to 27.6 kg/m<sup>3</sup>.

140 AGULHAS was initialised from a balanced field of the parent model interpolated to the  
141 high-resolution grid and ran from 1980 to 2014 using interannual forcing from ERA40  
142 [Uppala et al., 2005] and ERA-interim [Dee et al., 2011]. Version 2.2 of the HYCOM source  
143 code has been used in this model and, together with the second order advection scheme,  
144 provides an adequate representation of the Agulhas Current [Backeberg et al., 2014].  
145 However, limitations of the free running model include high levels of SSH variability south  
146 of Madagascar and offshore of the Agulhas Current, suggesting that eddy trajectories may  
147 be too regular in the model [Backeberg et al., 2014]. The data available for this study  
148 was a weekly output of the regional HYCOM model of the Agulhas region from 1980 to  
149 2014.

## 150 **2.2 The Agulhas Current Time-series Experiment**

151 The ACT experiment was established to obtain a multi-decadal proxy of Agulhas Current  
152 transport using satellite altimeter data. The first phase of the experiment was the *in situ*  
153 phase where the ACT mooring array was deployed in the Agulhas Current, near 34°S,  
154 for a period of three years from: 2010-2013 [Beal et al., 2015] (Figure 1). From the  
155 data collected, Beal et al. [2015], provided two volume transport estimates: (1) a box or  
156 boundary layer transport ( $T_{box}$ ) and (2) a western boundary jet transport ( $T_{jet}$ ).  $T_{box}$  is  
157 the net transport within a fixed distance from the coast, while  $T_{jet}$  is a stream dependent  
158 transport that is calculated by changing the boundaries of integration at each time step  
159 depending on the strength and cross-sectional area of the southwestward jet. The western  
160 boundary jet transport algorithm was developed to specifically exclude the northeastward  
161 transport during meander events, occurring inshore of the meander [Beal et al., 2015].

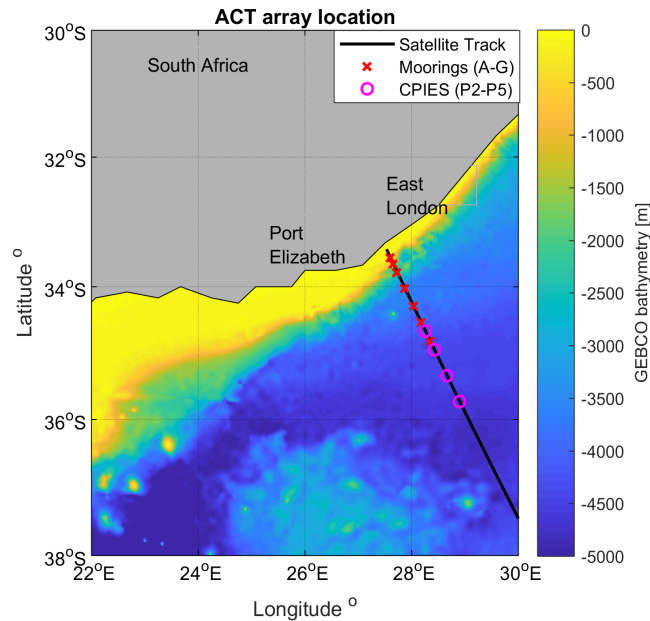

Figure 1: Geographical location of the ACT array with the mooring (red crosses) and CPIES (magenta circles) stations relative to the T/P, Jason-1,2,3 satellite track #96 (black line). Colour shading illustrates the GEBCO bathymetry (m).

162 During the second phase of the ACT experiment, Beal and Elipot [2016] built a 22-year  
 163 transport proxy by regressing the three years of *in situ* transport measurements (obtained  
 164 from phase 1) against along-track satellite altimeter data spanning the years 1993-2015.

### 165 2.3 Development of the Agulhas transport proxy

166 Previous analyses have shown that the vertical structure of the Agulhas Current is baro-  
 167 tropic [Elipot and Beal, 2015], implying that the relationship between surface geostrophic  
 168 velocity and full depth transport should be strong, despite the presence of the Agulhas  
 169 Undercurrent [Beal and Elipot, 2016] (Figure 2). Access to the data from the ACT ex-  
 170 periment allowed us validate the velocity cross-section in HYCOM (Figure 2). Beal et al.  
 171 [2015] defined the Agulhas Current to be 219 km wide and 3000 m deep on average, as is  
 172 reflected in the vertical section of the *in situ* ACT observations (Figure 2a). In HYCOM  
 173 the current appears to be wider, weaker and further offshore than the observed current,  
 174 on average the current is 254 km wide and extends deeper down to  $\sim 3500$  m, particularly  
 175 inshore, with a less pronounced undercurrent (Figure 2b).

176 The transport proxy created by Beal and Elipot [2016] was initially developed by finding  
 177 a linear relationship between transport and sea surface slope across the entire length

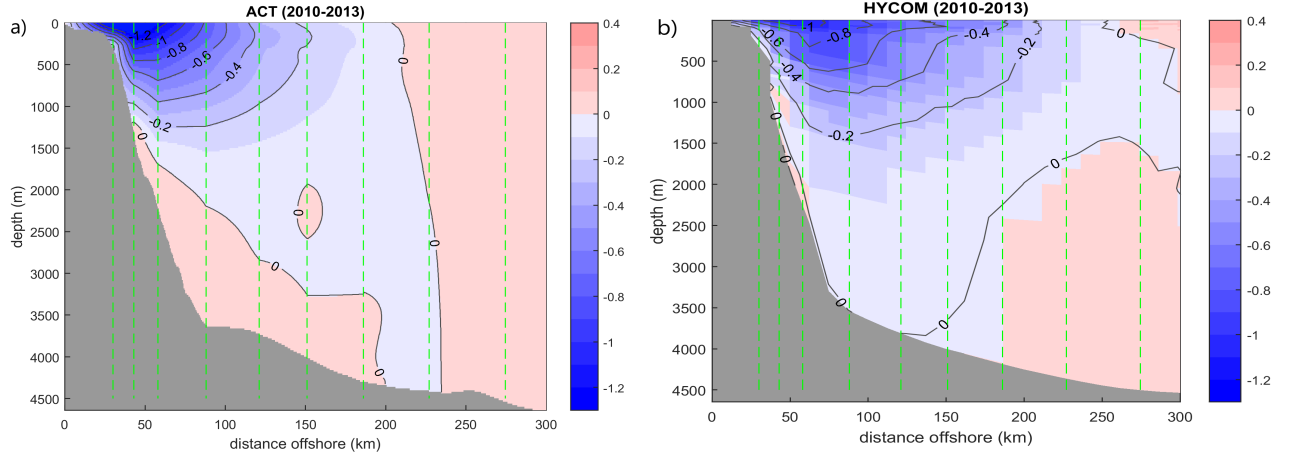

Figure 2: Time mean cross-section of the velocity structure of the Agulhas Current across the ACT array ( $m s^{-1}$ ) during the *in situ* ACT period (2010-2013) from (a) the ACT Observations (b) the HYCOM-AGULHAS simulation. Blue shading represents the negative, southwest current direction and pink shading represents the positive, northeast current flow. Contours are every  $0.2 m s^{-1}$ . Dashed green vertical lines represents the nine locations of the mooring and CPIES-pairs, the first line representing mooring A and CPIES-pair P4P5 furthest offshore.

178 of the ACT array, a common method used in previous studies [Imawaki et al., 2001;  
 179 van Sebille et al., 2010; Sprintall and Revelard, 2014; Yan and Sun, 2015]. However,  
 180 this method lead to uncertainty in the linear regression due to the strong, co-varying  
 181 sea surface height across the current. The preferred method was therefore to build nine  
 182 individual linear regression models, one for each mooring position and CPIES-pairs along  
 183 the ACT array, which locally related transport to sea surface slope [Beal and Elipot,  
 184 2016]. It is important to note that the regression models assumed a constant, linear  
 185 relationship between sea surface slope and transport over the three-year *in situ* period.  
 186 The transport variable in the regression models was defined as transport per unit distance,  
 187 i.e. the vertically integrated velocity with units in  $m^2 s^{-1}$ , where  $T_x$  represents the net  
 188 component of the current flow and  $T_{xsw}$  the southwestward component of the flow. The  
 189 total transports,  $T_{box}$  and  $T_{jet}$  in  $m^3 s^{-1}$ , were calculated by integrating the  $T_x$  and  $T_{xsw}$   
 190 estimates, predicted from the regression models, to the respective current boundaries.

## 191 2.4 Recreating the Agulhas transport proxy in HYCOM

### 192 2.4.1 Model Transport

193 In order to recreate the Agulhas Current proxy in HYCOM, data corresponding to the  
 194 measurements collected from the ACT mooring array were extracted from the model.  
 195 The barotropic velocity -equivalent to an integral of the velocity with depth- from each



196 mooring location (A-G) and CPIES pairs P3-P4 and P4-P5 [Beal et al., 2015] was ex-  
197 tracted for the 34-year model period. Extracting the barotropic velocity component from  
198 each mooring avoided interpolation errors that may have occurred if the model velocity  
199 was interpolated onto the locations of each current-meter instrument on each mooring  
200 [e.g. van Sebille et al., 2010]. Transport per unit distance ( $T_x$ ) for each mooring was  
201 calculated by multiplying the cross-track barotropic velocity by the respective depth at  
202 each mooring location and the sea surface slope for each of the locations were obtained  
203 from the model (hereafter CPIES pairs P3-P4 and P4-P5 were included as mooring posi-  
204 tions 8 and 9). The same method was employed to build regression models between sea  
205 surface slope and the southwestward component of the flow ( $T_{xsw}$ ), required to calculate  
206 the jet transport ( $T_{jet}$ ) [Beal et al., 2015]. To assess the accuracy of the transport proxy,  
207 the HYCOM transport proxy was compared to the simulated (native) transport in HY-  
208 COM to quantify the differences between the proxy and modelled transports and hence  
209 understand which processes the proxy may fail to represent.

#### 210 2.4.2 Model SSH

211 In order to reproduce the “along-track” SSH altimeter data needed to create the proxy as  
212 in Beal and Elipot [2016], 34 years of HYCOM SSH was linearly interpolated onto the  
213 coordinates of the TOPEX/Jason satellite track number 96 overlapping the model ACT  
214 array. The coordinates of the along-track altimeter data were obtained from the filtered  
215 12 km Jason-2 Aviso satellite product. To obtain the sea surface slope for each regression  
216 model, an optimal pair of SSH data points was chosen such that the horizontal length  
217 scale between them allowed for a maximum correlation between sea surface slope and  $T_x$ .  
218 The length scales of the slopes ranged from 24 km at mooring A to 12 km at mooring  
219 G and 48 km for the offshore CPIES-pairs, indicating an increase in the spatial scale  
220 of offshore flow, possibly due to increased offshore variability. Results from the *in situ*  
221 proxy experiment by Beal and Elipot [2016] also showed an increasing length scale with  
222 increasing distance offshore, however the results varied in magnitude: 27 km at mooring B  
223 to 102 km at mooring G. In this study the SSH slope was calculated such that a negative  
224 SSH slope corresponds to a negative surface velocity (southwest) according to geostrophy,

225 whereas a positive slope would indicate positive northeastward flow.

### 226 **2.4.3 Building the regression models**

227 Nine linear regression models were developed to estimate the transport per unit distance  
228 ( $T_x$  and  $T_{xsw}$ ) from the HYCOM sea surface slope during the same three-year period  
229 over which the ACT proxy was developed (April 2010- February 2013). The three-year  
230 time period is hitherto referred to as the reference period.

231 To calculate the total transport across the ACT array required continuous  $T_x$  estimates  
232 across the current. This was achieved as in Beal and Elipot [2016] by fitting a piecewise  
233 cubic Hermite interpolating polynomial function to obtain transport estimates at 1 km  
234 intervals from the coast to the end of the array (Figure 3). Fitting the transport function  
235 to the coast and equating it to zero would be equivalent to implementing a no slip bound-  
236 ary condition in the model. Before calculating the total transport the current boundaries  
237 needed to be defined. The box transport ( $T_{box}$ ) was calculated by integrating  $T_x$  hori-  
238 zontally to 230 km offshore, the three-year mean width of the current in HYCOM. The  
239 jet transport ( $T_{jet}$ ) was calculated using the algorithm developed by Beal et al. [2015]  
240 by integrating  $T_{xsw}$ , the southwest transport component, to the first maximum of  $T_x$   
241 beyond the half-width of the current (115 km in HYCOM) at each time step (Figure 3).

242 Assuming that the three-year linear relationship between SSH slope and transport per  
243 unit distance ( $T_x$  and  $T_{xsw}$ ) from 2010-2013 remains constant, the regression models  
244 were applied to the entire 34-year SSH model data. Thereafter, the 34-year transports  
245 were calculated by applying the same methods that were used to calculate the 3-year  
246 transport time-series; firstly, obtaining  $T_x$  estimates at 1 km-intervals along the array  
247 and secondly integrating horizontally to obtain  $T_{box}$  and  $T_{jet}$  (Figure 3).

### 248 **2.5 Comparison of the transport proxy to actual model transports**

249 The simulated model transports were calculated using the full-depth velocity fields across  
250 the array. If the relationship between SSH slope and transport is strong, there would be  
251 good agreement between the proxy and the actual model transports. To quantify this,  
252 correlations and transport statistics for the model and proxy were calculated from the

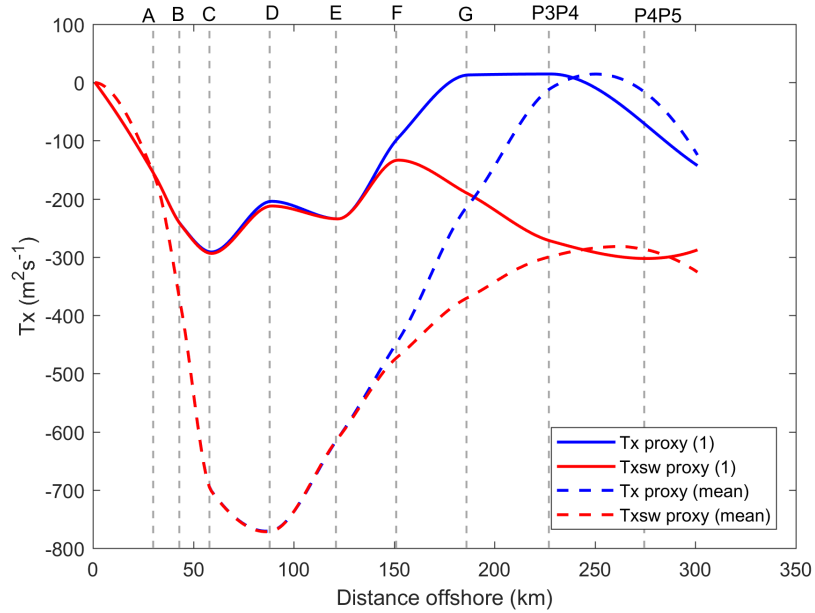

Figure 3: HYCOM transport per unit distance proxy ( $\text{m}^2 \text{s}^{-1}$ ) for Tx (blue) and Txsw (red) at 1 km intervals at the first model time step (solid lines) and for the ACT reference period (2010-2013, dashed lines). The grey dashed-lines represent the positions of moorings and offshore CPIES pairs.

253 two time-series (Table 2). These provided insight into which processes the proxy may  
 254 have failed to capture, which were then further investigated in HYCOM . Statistics are  
 255 deemed significant at the 95% significance level.

256 Eddy kinetic energy (EKE) was calculated to show the surface variability of the current  
 257 coincident with averaged SSH contours used to represent the mean surface structure  
 258 (Figure 6). EKE was calculated over the 3-year mean reference period, and over the  
 259 highest and lowest correlated years. In order to evaluate the subsurface current structure  
 260 along the ACT array, vertical velocity profiles were analysed for each mooring and CPIES-  
 261 pair over the 3-year mean reference period as well as over the highest and lowest correlated  
 262 years.

263 Transport variability in HYCOM was analysed by investigating residual transport events  
 264 in the least and best performing regression models. Residual transport events were iden-  
 265 tified as the outlying residual transport values above and below 2 standard deviations of  
 266 the estimated transport.

$$e = Txi - \hat{Txi} \quad (1)$$

267 where  $e$  is the estimated residuals,  $Txi$  is the HYCOM transport per unit distance value

268 and  $\hat{Txi}$  is the estimated transport per unit distance value according to the linear regres-  
269 sion models (i.e the transport proxy).

270 To investigate the current structure during these residual events, composite averages of  
271 the cross-track velocity structure were analysed. The cross-track velocity at each depth  
272 layer in HYCOM was extracted at 12 km intervals from 0 km to 400 km offshore, for the  
273 34-year model period. Although the ACT array only reached 300 km offshore, analysis of  
274 the current structure in HYCOM was extended further offshore. Previous analyses have  
275 shown increased levels of offshore variability in this HYCOM simulation [Backeberg et al.,  
276 2009; 2014], which therefore made it interesting to study the subsurface structure during  
277 the offshore current meanders and the influence these could have on the transport proxy.  
278 To further investigate the effect of the residual transport values on the transport proxy,  
279 all corresponding transport events exceeding plus or minus two standard deviations were  
280 removed from each linear regression model during development of the proxy (Figure 4).

## 281 **2.6 Sensitivity tests**

282 Sensitivity experiments were performed in HYCOM to test how many years of mooring  
283 data is needed to create an accurate proxy of Agulhas Current transport. With 34 years  
284 of model data the linear relationship could be tested over much longer or shorter periods.  
285 Using the method described in section 2.4.3, regression models were built using 1, 6, 12, 18  
286 and 34 years of HYCOM data. In addition, the proxies were calculated over two arbitrary  
287 3-year periods, to test the sensitivity of the proxy to current dynamics over different years.  
288 Lastly, the regression models were calculated over the maximum and minimum annual  
289 transport years in HYCOM, as well as during the years the HYCOM transport standard  
290 deviation was the largest and the smallest. Table 1 shows the time range over which the  
291 sensitivity experiments were performed.

Table 1: Sensitivity experiment time periods.

| Time range (years)             | Model dates                              |
|--------------------------------|------------------------------------------|
| 1                              | Jan 2011 - Dec 2011                      |
| 3                              | Apr 2010 - Feb 2013                      |
| 6                              | Jan 2009 - Dec 2014                      |
| 12                             | Jan 2003 - Dec 2014                      |
| 18                             | Jan 1997 - Dec 2014                      |
| 34                             | Jan 1980 - Dec 2014                      |
| 3*                             | Jan 1980 - Dec 1982; Jan 2000 - Dec 2002 |
| Max (Min) HYCOM transport.     | 2003 (1982)                              |
| Max (Min) HYCOM transport STD. | 2013 (1980)                              |

3\* Corresponds to the two additional 3-year periods

## 292 3 Results

### 293 3.1 HYCOM linear regression models

294 The coefficient of determination ( $R^2$ ) from the regression models highlight how well the  
295 linear relationship predicts the transport in HYCOM (Figure 4).  $R^2$  ranged from 0.86 at  
296 mooring A (30 km offshore) to 0.49 at the last CPIES-pair P4P5 (275 km offshore) for  
297  $T_x$  and 0.86 at mooring A to 0.37 at P4P5 for  $T_{xsw}$  (P values  $< 10^{-3}$ ). Results from Beal  
298 and Elipot [2016] showed an increase in the  $R^2$  statistics in the regression models ranging  
299 from 0.51 at mooring A and 0.81 for CPIES-pair P4P5 for  $T_x$ , indicating that the *in situ*  
300 observation based regression models had poorer skill inshore, whereas in HYCOM the  
301 regression models have poorer skill offshore. The results from the  $T_{xsw}$  regression models  
302 in HYCOM showed similar results to Beal and Elipot [2016] for the inshore mooring  
303 locations (A, B, C, E) with slightly higher correlations for offshore moorings F, G and  
304 CPIES-pair P3P4 but a lower correlation for D and the furthest CPIES-pair P4P5.

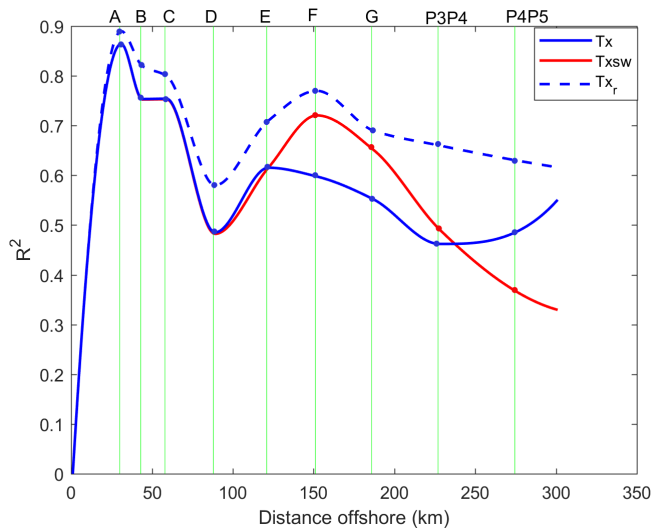

Figure 4:  $R^2$  statistics from the linear regression models showing the relationship between HYCOM SSH slope and HYCOM transport per unit distance for each mooring (A-G) and CRIES-pair (P3P4 & P4P5) over the 3-year reference period (2010-2013).  $T_x$  is represented by the solid blue line and  $T_{xsw}$  by the solid red line. The dashed blue line represents the results of  $T_x$  after the removal of the residual transport events (see section 3.4). Sites A - CRIES pair P4P5 are shown by the faint green lines.

### 305 3.2 Proxy validation

306 Two transport types, the box transport ( $T_{box}$ ) and the jet transport ( $T_{jet}$ ) were extracted  
 307 from HYCOM in order to validate the relative proxies. The  $T_{box}$  ( $T_{jet}$ ) proxy explained  
 308 57% (14%) of transport variance during the three-year reference period (2010-2013) (Table  
 309 2b). Using 34-years of model data (1980-2014), assuming the fixed 3-year relationship  
 310 between SSH slope and transport,  $T_{box}$  ( $T_{jet}$ ) explained 52% (26%) of the transport vari-  
 311 ance (Table 2b). Results from Beal and Elipot [2016] also showed that  $T_{box}$  explained a  
 312 higher percentage of variance (61%) during the ACT period than the jet transport proxy  
 313 ( $T_{jet}$ : 55%).

314 The 34-year mean transport and standard deviation from HYCOM for the box and jet  
 315 transport was  $-84 \pm 47$  Sv and  $-110 \pm 38$  Sv respectively (Table 2a). The proxy box and jet  
 316 transport was  $-87 \pm 34$  Sv and  $-92 \pm 31$  Sv respectively (Table 2a). According to the ACT  
 317 observations the mean transport and standard deviation was  $-77 \pm 32$  Sv for  $T_{box}$  and  $-84$   
 318  $\pm 24$  Sv for  $T_{jet}$ . A higher jet transport was expected considering it excludes northeast  
 319 counter-flows that decrease the box transport [Beal et al., 2015]. The differences between  
 320 the standard deviations of HYCOM and the proxy indicate that transport in HYCOM

Table 2: a) Summary of the transport statistics of the ACT observations over the 3-year *in situ* period and the HYCOM model transports and HYCOM proxy transports over the 3-year and extended 34-year time period. Negative values denote transport in the southwest direction. 1 Sv=10<sup>6</sup> m<sup>3</sup>s<sup>-1</sup>. b) Correlations between the HYCOM model transport and HYCOM proxy transport, for the box transport and jet transport with the percentage of variance shown in brackets. All correlations were significant.

| a)              | ACT<br>(2010-2013) |           | HYCOM<br>(2010-2013) |           | Proxy     |           | HYCOM<br>(1980-2014) |           | Proxy     |           |
|-----------------|--------------------|-----------|----------------------|-----------|-----------|-----------|----------------------|-----------|-----------|-----------|
| Transport       | $T_{box}$          | $T_{jet}$ | $T_{box}$            | $T_{jet}$ | $T_{box}$ | $T_{jet}$ | $T_{box}$            | $T_{jet}$ | $T_{box}$ | $T_{jet}$ |
| Mean & Std (Sv) | -77 ± 32           | -84 ± 24  | -81 ± 53             | -112 ± 41 | -91 ± 35  | -92 ± 30  | -84 ± 47             | -110 ± 38 | -87 ± 34  | -92 ± 32  |
| Max (Sv)        | -157               | -174      | -223                 | -244      | -196      | -185      | -236                 | -245      | -213      | -219      |
| Min (Sv)        | 23                 | -25       | 44                   | -48       | -36       | -46       | 87                   | -30       | -20       | -27       |

| b)        | $T_{box}$  | $T_{jet}$  |
|-----------|------------|------------|
| 2010-2013 | 0.75 (57%) | 0.38 (14%) |
| 1980-2014 | 0.72 (52%) | 0.51 (26%) |

321 experiences more variability compared to the proxy. The proxies only capture a portion  
 322 of the transport estimate from the HYCOM model, suggesting it also only captures a  
 323 portion of the model variability. The positive minimum transport values for  $T_{box}$  during  
 324 both time periods also appear to be peculiar, suggesting a current reversal during those  
 325 events (Table 2).

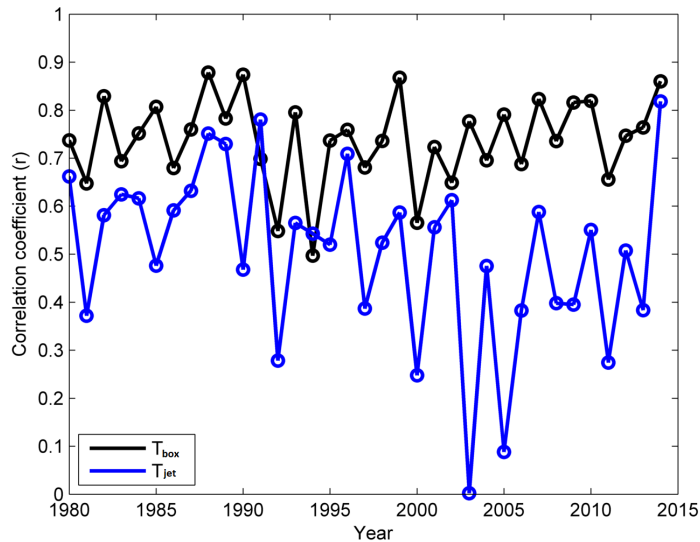

Figure 5: 34-year annual correlations between the box (black) and jet (blue) transport proxies against the box and jet transports extracted from HYCOM.

326 The  $T_{jet}$  annual correlation varies greatly from year to year with a significant maximum

327 correlation of 0.82 (2014) and a minimum correlation of 0.00 (2003) (Figure 5). In con-  
328 trast, the correlations for  $T_{box}$  vary much less and are always significant with a maximum  
329 correlation of 0.88 (1988) and minimum correlation of 0.50 (1994) (Figure 5). The box  
330 transport has higher correlations for most of the 34-year time period except during two  
331 single years where the jet transport has a higher correlation, 0.78 versus 0.70 during 1991  
332 and 0.54 versus 0.50 during 1994. These results indicate that the proxy is generally better  
333 suited in HYCOM to estimate the box transport rather than the jet transport.

334 The jet transport proxy by Beal and Elipot [2016] was developed to estimate the transport  
335 of the Agulhas Current during mesoscale meander events, which generally causes the  
336 current to manifest as a full-depth, surface intensified, cyclonic circulation out to 150 km  
337 from the coast with anticyclonic circulation farther offshore [Elipot and Beal, 2015]. The  
338 Agulhas meanders in the HYCOM simulation occur in association with large anticyclonic  
339 eddies predominantly located at the offshore edge of the current, with a narrow, southwest  
340 stream close to the coast [Backeberg et al., 2009]. In some instances anticyclonic eddies  
341 span the length of the entire array. Therefore, considering that the model is unable to  
342 resolve the dynamics associated with meander events, for which the jet transport algorithm  
343 was specifically developed, further analysis only focuses on the box transport proxy.

### 344 **3.3 Evaluating the net transport proxy**

345 The strengths and weaknesses of the box proxy are further investigated by selecting the  
346 highest and lowest correlated years from the 34-year annual correlations (Figure 5), and  
347 evaluated by plotting the current structure in the model over the respective years (Figures  
348 6 & 7).

349 During the year with maximum correlation (1988) the current is stable and inshore,  
350 whereas during the lowest correlated year (1994) and during the proxy reference period  
351 (2010-2013) the current is meandering and it appears that a large portion of the energy  
352 of the current has been shifted offshore (Figure 6). The narrow spacing of the SSH  
353 contours for all three periods indicates a strong gradient inshore and hence a strong  
354 mean geostrophic current, however the wide spacing between the SSH contours offshore  
355 suggests that the variability in the model is confined to the offshore side of the current.  
356 It is assumed that high levels of mesoscale variability in the model could bias the current



357 position and hence the transport estimate. However, based on the analysis there were  $\sim 5$   
358 anticyclonic eddies during the highest correlated year (1988) and  $\sim 7$  anticyclonic eddies  
359 during the lowest correlated year which does not explain the difference in the accuracy of  
360 the proxy for those years.

361 The model cross-track velocity changes direction with depth, specifically for offshore moor-  
362 ing G and CPIES-pairs P3P4 and P4P5, at the depth of  $\sim 2000$  m (Figure 7) thereby  
363 defining the depth of the Agulhas jet. During the 3-year reference period the velocity  
364 changes direction at moorings B and G ( $\sim 1200$  m and  $\sim 2000$  m respectively) and at  
365 sites P3P4 ( $\sim 2000$  m) and P4P5 ( $\sim 300$  m,  $\sim 2000$  m). During 1988, sites F-P4P5 exper-  
366 ience a change in direction ( $> \sim 2000$  m). Lastly, during 1994 mooring G and sites P3P4  
367 and P4P5 exhibit a change in direction ( $> \sim 2000$ m). An explanation for the offshore  
368 subsurface countercurrents may be due to the impinging baroclinic eddies continuously  
369 propagating downstream [Backeberg et al., 2009], affecting the entire water column by  
370 changing the direction of flow at certain depths. This directly impacts the accuracy of the  
371 proxy and explains why the transport proxy fails to capture current reversals (Table 2),  
372 because the SSH slope does not capture the subsurface countercurrents associated with  
373 the impinging baroclinic eddies.

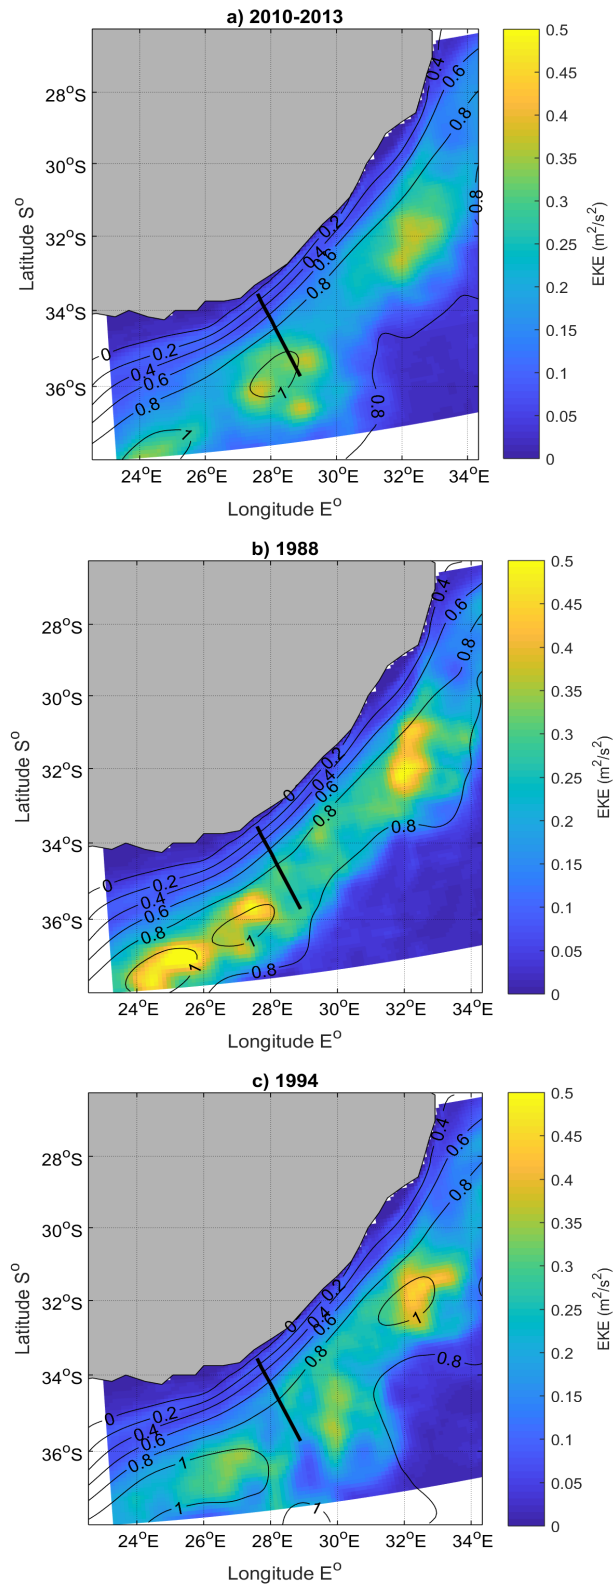

Figure 6: Eddy kinetic energy (EKE in  $\text{m}^2\text{s}^{-2}$ ) and sea surface height (SSH in m) contours during (a) the reference period (2010-2013) (b) the highest (1988) and (c) lowest (1994) correlated years. The black line representing the ACT array.

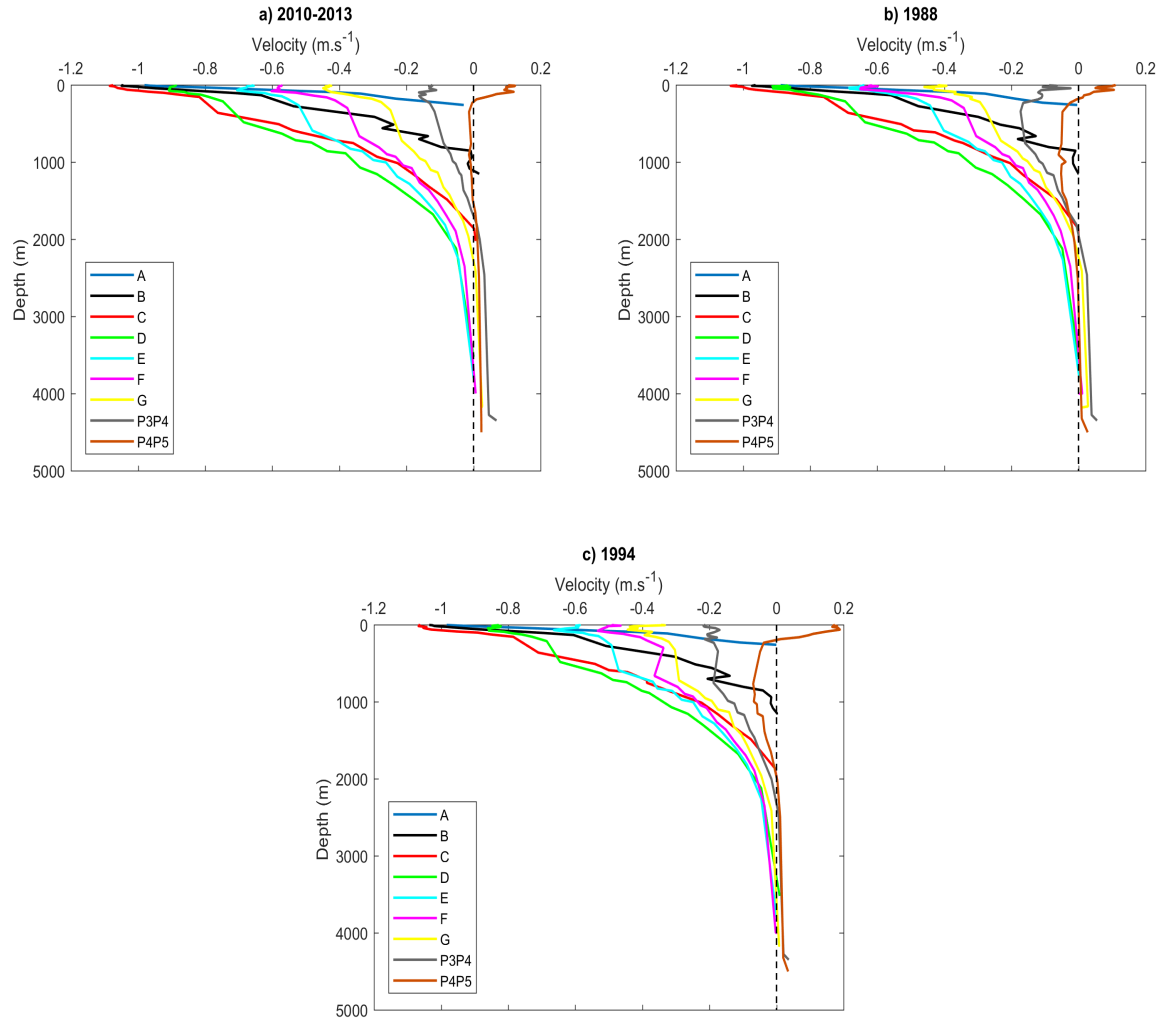

Figure 7: Mean cross-track velocity profiles ( $\text{m s}^{-1}$ ) during (a) the 3-year reference period (2010-2013), (b) during the highest correlated year (1988) and (c) the lowest correlated year (1994). Each colour represents the different moorings (A-G) and CPIES-pairs (P3P4 & P4P5) . Negative values indicate southwestward flow.

### 374 3.4 Investigating the transport variability

375 As shown previously, the performance of the linear regression models weakened moving  
 376 offshore (Figure 4). Regression model, RM8 (CPIES-pair P3P4, Figure 8a) captured the  
 377 least transport variance at 46% and RM 1 (mooring A, Figure 8b) explained the most  
 378 transport variance at 86%. According to our methods a negative SSH slope in HYCOM  
 379 corresponds to a negative (southwest) surface velocity and if the current structure were  
 380 barotropic, a negative (southwest) transport and vice versa.

381 As shown in regression model 1 (Figure 8b), all the data points are clustered such that  
 382 the negative SSH slope relates to a negative transport per unit distance, in the absence of

383 northeast counterflows. Careful analyses of regression model 8 indicates that eight of the  
 384 nine residual transport events violate the proportional relationship between SSH slope and  
 385  $Tx$  (Figure 8a). Some of which have a negative SSH slope relating to a positive transport  
 386 per unit distance where others show a positive SSH slope with negative transport per unit  
 387 distance. Therefore the SSH slope does not always reflect the direction of flow at depth,  
 388 and thus the correct sign for  $Tx$ .

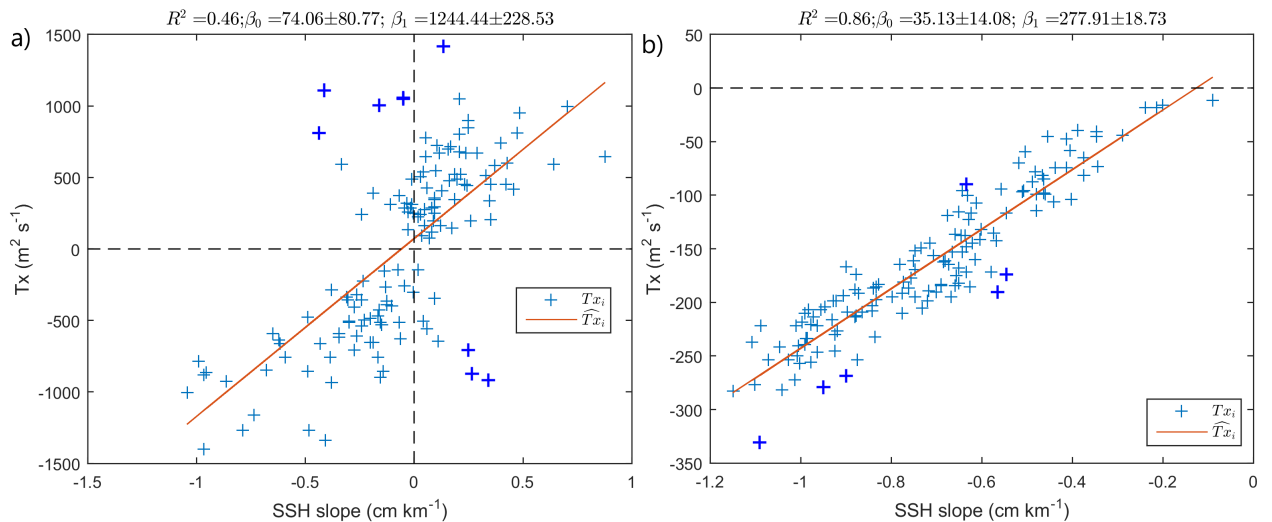

Figure 8: Linear regression models showing the relationship between HYCOM SSH and transport per unit distance ( $Tx$ ) for a) RM 8; capturing the least transport variance (46%) and b) RM 1; capturing the most transport variance (86%).  $Txi$  (blue crosses) represent the  $Tx$  values from HYCOM and  $\hat{Txi}$  (red line) represents the  $Tx$  estimates from the linear regression model. The bold crosses highlight the residual transport events with transport values greater or less than 2 standard deviations of the transport estimate. The coefficient of determination ( $R^2$ ) quantifies the amount of variance explained by the regression model,  $\beta_i$  is the slope coefficient and  $\beta_0$  the intercept with 95% confidence intervals. Note the different scaling on the x & y-axes.

389 It was expected that removing the outlying transport events (outliers larger than  $\pm 2$   
 390 standard deviations) would increase the statistical performance of the linear regression  
 391 models (Figure 4). However, it is noteworthy that the improvement was remarkably better  
 392 for the offshore regression models, since the baroclinic eddies responsible for breaking down  
 393 the linear relationship between SSH slope and transport frequently effected the offshore  
 394 edge of the current.

395 Examination of the composite cross-track velocity structure of the residual transport  
 396 events (Figure 9) shows that there is a change in the direction of velocity in the bottom  
 397 layers at the location of regression model 8 (CPIES-pair P3P4). The cross-track flow  
 398 in the surface layers ( $\sim 0-700$  m) of the current is southwestward, whereas below  $\sim 700$

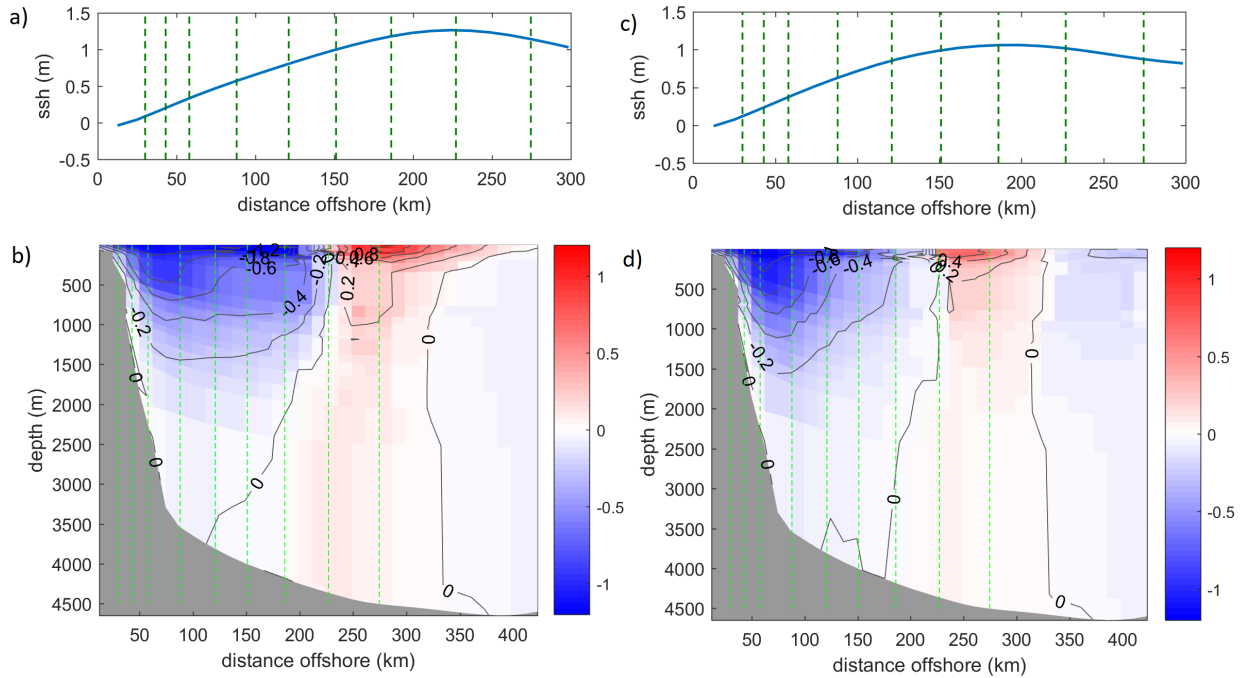

Figure 9: Mean SSH (m) and composite cross-track velocity structure ( $ms^{-1}$ ) of the residual transport events from a & b) regression model 8 and c & d) regression model 1. Blue shading represents the negative, southwest current direction and red represents the positive, northeast current flow. Contours are every  $0.2 ms^{-1}$ . Dashed vertical lines represents the nine locations of the mooring and CRIES-pairs, the first line representing mooring A and CRIES-pair P4P5 furthest offshore.

399 m the flow is northeastward. Therefore, the vertically integrated flow ( $T_x$ ) is positive  
 400 (northeastward) and in the opposite direction implied by the SSH slope. In contrast, at  
 401 mooring A, the composite velocity field is always towards the southwest, consistent with  
 402 the SSH slope.

### 403 3.5 Sensitivity tests

404 The 34-year Agulhas transport proxy was based on regression models built using only 3  
 405 years of HYCOM model data. The statistics in Table 3 show the results obtained from  
 406 building the linear regression models and deriving the transport proxy using 1, 3, 6, 12,  
 407 18 and 34 years of model data. We find that the correlation between proxy box transport  
 408 and model box transport is not improved by using more model data to build the proxy.  
 409 Using data from 2010-2013 the correlation of 0.72 changes by no more than 0.01 when  
 410 extending the number of years of model data (Table 3). Similarly, building the proxy

Table 3: Transport statistics and correlation results obtained from calculating the net transport proxy over a range of time periods.

| Net transport    | Transport (Sv) | STD (Sv) | RMSE (Sv) | r    |
|------------------|----------------|----------|-----------|------|
| <b>MODEL</b>     | -84.32         | 47.23    | 0         | 1.00 |
| <b>1-yr</b>      | -87.26         | 35.47    | 33.36     | 0.71 |
| <b>3-yr</b>      | -87.21         | 34.09    | 32.76     | 0.72 |
| <b>6-yr</b>      | -87.04         | 35.91    | 33.04     | 0.72 |
| <b>12-yr</b>     | -86.91         | 32.51    | 32.83     | 0.72 |
| <b>18-yr</b>     | -88.71         | 31.28    | 32.95     | 0.72 |
| <b>34-yr</b>     | -88.15         | 29.74    | 33.14     | 0.72 |
| <b>1980-1982</b> | -87.86         | 26.80    | 34.14     | 0.70 |
| <b>2000-2002</b> | -94.80         | 30.31    | 32.87     | 0.72 |

411 with one year of model data decreases the correlation by only 0.01 (Table 3). The only  
 412 difference was the decrease in standard deviation.

413 The sensitivity of the box transport proxy was also tested using two arbitrary 3-year peri-  
 414 ods. In comparison to the correlation obtained during 2010-2013 the correlation decreased  
 415 by 0.02 during 1980-1982 and remained the same during 2000-2002. The results obtained  
 416 from calculating  $T_{box}$  proxy during the maximum (minimum) transport and standard de-  
 417 viation years in HYCOM showed no improvement or decrease in the skill of the proxy  
 418 either.

## 419 4 Summary and conclusions

420 The Agulhas Current transport proxies, developed by Beal and Elipot [2016], were based  
 421 on nine linear regression models, each assuming a constant linear relationship from three  
 422 years of observations between *in situ* transport and satellite along-track sea surface gradi-  
 423 ents. Applying constant linear models and assuming a constant vertical current structure,  
 424 the transport proxies were extended using 22-years of along-track satellite data to cre-  
 425 ate two 22-year time-series of Agulhas Current transports [Beal and Elipot, 2016]. The  
 426 Agulhas Current transport proxies in this study replicates the methods used by Beal and  
 427 Elipot [2016] but applies these using a regional HYCOM model of the Agulhas Current  
 428 [Backeberg et al., 2009; 2014].

429 The HYCOM transport proxies were developed using nine, three-year linear regression  
 430 models between model transport and model SSH slope, and extended using 34-years  
 431 of the model SSH data from 1980 to 2014. The HYCOM model provided the means to

432 investigate the validity of the assumptions used to create the proxies, such as the constant  
433 vertical structure of the current, hence a constant relationship between SSH slope and  
434 transport per unit distance during the 3-year reference period and secondly, the temporal  
435 scale of observations needed to build a strong linear relationship between transport and  
436 SSH slope.

437 Overall, results showed that the proxy was more capable of estimating the box transport  
438 (net transport) over the 34 model period, explaining 52% of the transport variance in  
439 comparison to 26% of the jet transport (southwest transport) variance. A limitation  
440 of this study is that HYCOM is unable to resolve all of the observed dynamics in the  
441 Agulhas Current, specifically the mesoscale meander events. The model demonstrated  
442 much higher levels of mesoscale variability than observed [Backeberg et al., 2008; 2009].  
443 On average, 1.6 mesoscale meanders pass through the ACT array at 34°S per year [Rouault  
444 and Penven, 2011; Elipot and Beal, 2015]. In HYCOM, an average of 5 anticyclonic eddies  
445 passed over the array per year. The poorer performance of the  $T_{jet}$  proxy in HYCOM  
446 (26%) compared to the *in situ*  $T_{jet}$  proxy (55%) of Beal and Elipot [2016] is due to various  
447 model discrepancies including the consistent merging of the anticyclonic eddies with the  
448 Agulhas Current in the northern region [Backeberg et al., 2014], which is due to poorly  
449 resolved eddy interactions and dissipation processes [Braby et al., 2016], a limitation of  
450 many numerical ocean models in this region [Tsugawa and Hasumi, 2010; Penven et al.,  
451 2011; Durgadoo et al., 2013; Backeberg et al., 2014; Loveday et al., 2014].

452 Furthermore, although the resolution of HYCOM is able to capture the mesoscale dy-  
453 namics of eddies [Holton et al., 2017], it fails to resolve the near-coastal features, such as  
454 the inshore, surface intensified cyclonic motion in this simulation. This would require a  
455 finer resolution at the coast, in order to reveal smaller offshore displacements,  $\sim 50$  km,  
456 associated with these meander events [Elipot and Beal, 2015]. The poorer performance of  
457 the  $T_{jet}$  proxy in HYCOM and possibly in the *in situ* study, may also be because it only  
458 represents the southwestward component of the flow, whereas the input sea surface slope  
459 reflects the net flow along the array. Therefore, based on these findings further analysis  
460 focussed on the  $T_{box}$  proxy.

461 The frequently impinging eddies have been found to make it difficult to effectively estim-  
462 ate the accurate box transport of the Agulhas Current in the model since the advection of

463 these eddies are responsible for large transport fluctuations [Backeberg et al., 2009]. The  
464 transport proxy only included the transport of the portion of the eddy that was reflected  
465 in the SSH signal across the array, whether it was the southwestward or northeastward  
466 portion of the eddy or both. Although the transport proxy may capture the SSH signal  
467 of the eddies along the array, the correlation of the regression models decreases offshore.  
468 Therefore transport estimates inshore would be more accurate than the transport estim-  
469 ates offshore when the current is in a meandering state.

470 It was shown that removing the residual transport events, violating the proportional re-  
471 lationship between SSH slope and transport as a result of impinging baroclinic eddies,  
472 improved the proxy performance i.e. increased the percentage of transport variance ex-  
473 plained. Several studies have suggested methods to decrease the levels of EKE in numerical  
474 simulations. Backeberg et al. [2009] improved the representation of the southern Agulhas  
475 Current by applying a higher-order momentum advection scheme, resulting in a well-  
476 defined meandering current rather than a continuous stream of eddies. Anderson et al.  
477 [2011] found that the use of relative wind forcing significantly decreased eddy intensities  
478 and a study by Renault et al. [2017] focussed on the current stress feedback between the  
479 ocean and atmosphere, demonstrated a reduction of mesoscale variability by coupling the  
480 ocean model with an atmospheric model. Improving the mesoscale variability in HYCOM  
481 could therefore yield better results for the transport proxy, specifically for the offshore  
482 regression models, in the future. In order to effectively mirror the performance of the *in*  
483 *situ* transport proxy [Beal and Elipot, 2016], a numerical model that accurately simulates  
484 Agulhas meanders and the vertical variability, including an accurate representation of the  
485 Agulhas Undercurrent is required and this has not yet been achieved in existing regional  
486 configurations.

487 The development of the ACT transport proxy was initially tested using a regional NEMO  
488 configuration in order to evaluate the potential of the altimeter proxy to monitor the  
489 multi-decadal transport of the Agulhas Current [van Sebille et al., 2010]. Using the  
490 numerical model, it was concluded that the correlation between the Agulhas Current  
491 transport and gradient in sea surface height was greater than  $r=0.78$  for any three-year  
492 measuring period, and is therefore an adequate timescale to build an accurate transport  
493 proxy [van Sebille et al., 2010].



494 The HYCOM output in this study was used to test the validity of the relationship between  
495 transport and SSH slope over a range of time periods. It was hypothesised that building  
496 the linear relationship over longer time periods,  $>3$  years, would increase the skill of the  
497 transport proxy, since the linear relationship would include more current variability over  
498 longer periods of time. The results showed that calculating the transport proxy over  
499 longer or shorter time periods did not necessarily improve the performance of the proxy,  
500 thereby suggesting that the current dynamics for any 3-year period in the model could be  
501 very similar, in agreement with the results obtained in van Sebille et al. [2010], suggesting  
502 that the results were consistent despite the model biases. This suggests that 3-years is  
503 an appropriate time-period to develop the transport proxy of the Agulhas Current in  
504 HYCOM.

505 Lastly, the study showed that the transport proxy is sensitive to subsurface variability in  
506 the model, hence caution should be taken regarding the implicit assumption of a fixed  
507 vertical current structure. The accuracy of the transport proxy remains sensitive to model  
508 bias. Hence the sensitivity of the proxy should be tested in other model simulations.  
509 Sensitivity studies of this kind, using numerical ocean models, provide useful information  
510 advancing our understanding of the sensitivities and limitations of transport proxies,  
511 contributing to the improvement of long-term ocean monitoring approaches and assisting  
512 in the development and planning of future measurement programmes.

513 *\*Authors contributions*

514 E.V. conducted the data analyses and wrote up the final paper. B.B provided the HYCOM  
515 model data, supervised the project and provided financial support. J.H. supervised the  
516 project and provided financial support and S.E. assisted with the methodology of the  
517 transport proxy. All authors helped to conceptualize ideas and contributed to writing the  
518 paper.

519 We have no conflicts of interest to disclose.

520 *\*Acknowledgements*

521 This work has been funded by the National Research Foundation of South Africa and  
522 by the bilateral South Africa-Norway SANCOOP SCAMPI project. We would like to  
523 thank the Nansen-Tutu Centre in South Africa and SAEON for providing opportunities  
524 to present the project locally and internationally. We thank the Nansen Environmental  
525 Remote Sensing Centre (NERSC) in Bergen, Norway, for hosting us for a duration of  
526 the project and wish to thank Dr. Knut-Arild Lisæter for his guidance while working at  
527 NERSC. We gratefully acknowledge Professor Lisa Beal, Dr. Shane Elipot and the rest of  
528 the ASCA team from the Rosenstiel School of Marine and Atmospheric Science (RSMAS),  
529 University of Miami, for granting us permission to replicate the Agulhas transport proxy  
530 methods. Shane Elipot was supported by the U.S. National Science Foundation through  
531 the ASCA project, Award OCE-1459543.

## 532 **References**

- 533 Anderson, L. A., McGillicuddy, D. J., Maltrud, M. E., Lima, I. D., and Doney, S. C.: Im-  
534 pact of eddy-wind interaction on eddy demographics and phytoplankton community  
535 structure in a model of the North Atlantic Ocean, *Dynamics of Atmospheres and*  
536 *Oceans*, 52, 80–94, <https://doi.org/10.1016/j.dynatmoce.2011.01.003>, 2011.
- 537 Andres, M., Park, J.-H., Wimbush, M., X-H, Z., Chang, K., and Ichikawa, H.: Study  
538 of the Kuroshio / Ryukyu Current System Based on Satellite-Altimeter and in situ  
539 Measurements, *Journal of Oceanography*, 64, 937–950, 2008.
- 540 Backeberg, B. C., Johannessen, J. A., Bertino, L., and Reason, C. J.: The greater Agulhas  
541 Current system: An integrated study of its mesoscale variability, *Journal of Physical*  
542 *Oceanography*, 1, 29–44, 2008.
- 543 Backeberg, B. C., Bertino, L., and Johannessen, J. A.: Evaluating two numerical advec-  
544 tion schemes in HYCOM for eddy-resolving modelling of the Agulhas Current, *Ocean*  
545 *Science*, pp. 173–190, 2009.
- 546 Backeberg, B. C., Penven, P., and Rouault, M.: Impact of intensified Indian Ocean winds  
547 on mesoscale variability in the Agulhas system, *Nature Climate Change*, 2, 608–612,  
548 <https://doi.org/10.1038/nclimate1587>, 2012.
- 549 Backeberg, B. C., Counillon, F., Johannessen, J. a., and Pujol, M. I.: Assimilating along-  
550 track SLA data using the EnOI in an eddy resolving model of the Agulhas system,  
551 *Ocean Dynamics*, pp. 1121–1136, <https://doi.org/10.1007/s10236-014-0717-6>, 2014.
- 552 Beal, L. M. and Elipot, S.: Broadening not strengthening of the Agulhas Current since  
553 the early 1990s, *Nature Publishing Group*, 540, 570–573, [https://doi.org/10.1038/](https://doi.org/10.1038/nature19853)  
554 [nature19853](https://doi.org/10.1038/nature19853), 2016.
- 555 Beal, L. M., De Ruijter, W. P. M., Biastoch, A., and Zahn, R.: On the role of the  
556 Agulhas system in ocean circulation and climate., *Nature*, 472, 429–36, [https://doi.org/](https://doi.org/10.1038/nature09983)  
557 [10.1038/nature09983](https://doi.org/10.1038/nature09983), 2011.
- 558 Beal, L. M., Elipot, S., Houk, A., and Leber, G. M.: Capturing the Transport Variability  
559 of a Western Boundary Jet: Results from the Agulhas Current Time-Series Experiment

560 (ACT)\*, *Journal of Physical Oceanography*, 45, 1302–1324, <https://doi.org/10.1175/>  
561 JPO-D-14-0119.1, 2015.

562 Biastoch, A. and Krauss, W.: The Role of Mesoscale Eddies in the Source Regions of the  
563 Agulhas Current, *Journal of Physical Oceanography*, 29, 2303–2317, 1999.

564 Birol, F., Fuller, N., Lyard, F., Cancet, M., Nino, F., Delebecque, C., Fleury, S., Toubanc,  
565 F., Melet, A., Saraceno, M., et al.: Coastal applications from nadir altimetry: Example  
566 of the X-TRACK regional products, *Advances in Space Research*, 59, 936–953, 2017.

567 Bleck, R.: An oceanic general circulation model framed in hybrid isopycnic-Cartesian  
568 coordinates, 37, 55–88, 2002.

569 Braby, L., Backeberg, B. C., Ansorge, I., Roberts, M. J., Krug, M., and Reason, C. J. C.:  
570 Observed eddy dissipation in the Agulhas Current, *Geophysical Research Letters*, 43,  
571 8143–8150, <https://doi.org/10.1002/2016GL069480>, 2016.

572 Cai, W.: Antarctic ozone depletion causes an intensification of the Southern Ocean  
573 super-gyre circulation, *Geophysical Research Letters*, 33, 1–4, <https://doi.org/10.1029/>  
574 2005GL024911, 2006.

575 Chassignet, E. P., Hurlburt, H. E., Martin, O., Halliwell, G. R., Hogan, P. J., Wallcraft,  
576 A. J., Baraille, R., and Bleck, R.: The HYCOM (HYbrid Coordinate Ocean Model) data  
577 assimilative system, 65, 60–83, <https://doi.org/10.1016/j.jmarsys.2005.09.016>, 2007.

578 Chelton, D. B., DeSzoeke, R. A., Schlax, M. G., El Naggar, K., and Siwertz, N.: Geograph-  
579 ical Variability of the First Baroclinic Rossby Radius of Deformation, *Journal of Phys-*  
580 *ical Oceanography*, 28, 433–460, [https://doi.org/10.1175/1520-0485\(1998\)028<0433:](https://doi.org/10.1175/1520-0485(1998)028<0433:)  
581 [GVOTFB>2.0.CO;2](https://doi.org/10.1175/1520-0485(1998)028<0433:GVOTFB>2.0.CO;2), 1998.

582 de Ruijter, W. P. M., van Leeuwen, P. J., and Lutjeharms, J. R. E.: Generation and  
583 Evolution of Natal Pulses: Solitary Meanders in the Agulhas Current, *Journal of Phys-*  
584 *ical Oceanography*, 29, 3043–3055, [https://doi.org/10.1175/1520-0485\(1999\)029<3043:](https://doi.org/10.1175/1520-0485(1999)029<3043:)  
585 [GAEONP>2.0.CO;2](https://doi.org/10.1175/1520-0485(1999)029<3043:GAEONP>2.0.CO;2), 1999.

586 Dee, D. P., Uppala, S. M., Simmons, A. J., Berrisford, P., Poli, P., Kobayashi, S., Andrae,  
587 U., Balmaseda, M. A., Balsamo, G., Bauer, P., Bechtold, P., Beljaars, A. C. M., Berg,

588 L. V. D., Bidlot, J., Bormann, N., Delsol, C., Dragani, R., Fuentes, M., Geer, A. J.,  
589 and Dee, D. P.: The ERA-Interim reanalysis : configuration and performance of the  
590 data assimilation system, pp. 553–597, <https://doi.org/10.1002/qj.828>, 2011.

591 Dijkstra and de Ruijter, W.: On the Physics of the Agulhas Current : Steady Retroflection  
592 Regimes, *Journal of Physical Oceanography*, 31, 2971–2985, 2001.

593 Durgadoo, J., Loveday, B., Reason, C., Penven, P., and Biastoch, A.: Agulhas Leakage  
594 Predominantly Responds to the Southern Hemisphere Westerlies, *Journal of Physical  
595 Oceanography*, 43, 2113–2131, <https://doi.org/10.1175/JPO-D-13-047.1>, 2013.

596 Elipot, S. and Beal, L.: Characteristics , Energetics , and Origins of Agulhas Current  
597 Meanders and their Limited Influence on Ring Shedding, *Journal of Physical Oceanog-  
598 raphy*, 45, 2294—2314, 2015.

599 Fu, L.-L., Chelton, D., Le Traon, P.-Y., and Morrow, R.: Eddy Dynamics From Satellite  
600 Altimetry, *Oceanography*, 23, 14–25, <https://doi.org/10.5670/oceanog.2010.02>, 2010.

601 George, M. S., Bertino, L., O.M, J., and A, S.: Validation of a hybrid coordinate  
602 ocean model for the Indian Ocean, *Journal of Operational Oceanography*, 3, 25–38,  
603 <https://doi.org/10.1080/1755876X.2010.11020115>, 2010.

604 Gordon, A. L.: Oceanography: The brawniest retroflection, *Nature*, 421, 904–905,  
605 <https://doi.org/10.1038/421904a>, 2003.

606 Gordon, A. L., Lutjeharms, J. R., and Gründlingh, M. L.: Stratification and circulation at  
607 the Agulhas Retroflection, *Deep Sea Research Part A. Oceanographic Research Papers*,  
608 34, 565–599, [https://doi.org/10.1016/0198-0149\(87\)90006-9](https://doi.org/10.1016/0198-0149(87)90006-9), 1987.

609 Hermes, J. C., Reason, C., and Lutjeharms, J.: Modeling the Variability of the Greater  
610 Agulhas Current System, *Journal of climate*, 20, 3131–3146, [https://doi.org/10.1175/  
611 JCLI4154.1](https://doi.org/10.1175/JCLI4154.1), 2007.

612 Holton, L., Deshayes, J., Backeberg, B., Loveday, B., Hermes, J., and Reason, C.: Spatio-  
613 temporal characteristics of Agulhas leakage: a model inter-comparison study, *Climate  
614 dynamics*, 48, 2107–2121, 2017.

615 Imawaki, S., Uchida, H., Ichikawa, H., and Fukasawa, M.: Satellite altimeter monitoring  
616 the Kuroshio transport south of Japan, *Geophysical Research Letters*, 28, 17–20, 2001.

617 Loveday, B. R., Durgadoo, J. V., Reason, C. J., Biastoch, A., and Penven, P.: Decoupling  
618 of the Agulhas leakage from the Agulhas Current, *Journal of Physical Oceanography*,  
619 44, 1776–1797, <https://doi.org/10.1175/JPO-D-13-093.1>, 2014.

620 Lutjeharms, J. R. E.: *The Agulhas Current*, 2006.

621 Maul, G. A., Mayer, D. A., and Bushnell, M.: Statistical relationships between local sea  
622 level and weather with Florida-Bahamas cable and Pegasus measurements of Florida  
623 Current volume transport, *Journal of Geophysical Research*, 95, 3287–3296, 1990.

624 Penven, P., Herbette, S., and Rouault, M.: Ocean Modelling in the Agulhas Current  
625 System, in: *Nansen-Tutu Conference Proceedings*, pp. 17–21, [https://doi.org/10.1017/](https://doi.org/10.1017/CBO9781107415324.004)  
626 [CBO9781107415324.004](https://doi.org/10.1017/CBO9781107415324.004), 2011.

627 Reason, C. J. C.: Subtropical Indian Ocean SST dipole events and southern African  
628 rainfall, *Geophysical Research Letters*, 28, 2225–2227, 2001.

629 Renault, L., McWilliams, J. C., Penven, P., Renault, L., McWilliams, J. C., and Pen-  
630 ven, P.: Modulation of the Agulhas Current Retroflexion and Leakage by Oceanic  
631 Current Interaction with the Atmosphere in Coupled Simulations, *Journal of Physical*  
632 *Oceanography*, 47, 2077–2100, <https://doi.org/10.1175/JPO-D-16-0168.1>, 2017.

633 Rouault, M. and Lutjeharms, J.: Estimation of sea-surface temperature around southern  
634 Africa from satellite-derived microwave observations., *South African journal of science*,  
635 99, 489–493, 2003.

636 Rouault, M., White, S. A., Reason, C. J. C., Lutjeharms, J. R. E., and Jobard, I.:  
637 Ocean Atmospheric Interaction in the Agulhas Current Region and a South African  
638 Extreme Weather Event, *Weather and Forecasting*, 17, 655–669, [https://doi.org/10.](https://doi.org/10.1175/1520-0434(2002)017<0655:OAIITA>2.0.CO;2)  
639 [1175/1520-0434\(2002\)017<0655:OAIITA>2.0.CO;2](https://doi.org/10.1175/1520-0434(2002)017<0655:OAIITA>2.0.CO;2), 2002.

640 Rouault, M. J. and Penven, P.: New perspectives on Natal Pulses from satellite ob-  
641 servations, *Journal of Geophysical Research: Oceans*, 116, 1–14, [https://doi.org/](https://doi.org/10.1029/2010JC006866)  
642 [10.1029/2010JC006866](https://doi.org/10.1029/2010JC006866), 2011.

643 Rouault, M. J., Mouche, A., Collard, F., Johannessen, J. A., and Chapron, B.: Mapping  
644 the Agulhas Current from space : An assessment of ASAR surface current velocities,  
645 Journal of Geophysical Research, 115, 1–14, <https://doi.org/10.1029/2009JC006050>,  
646 2010.

647 Smith, L., , Boudra, D., and R, B.: A Wind-Driven Isopycnic Coordinate Model of the  
648 North and Equatorial Atlantic Ocean 2 . The Atlantic Basin Experiments, Journal of  
649 Geophysical Research, 95, 105–128, 1990.

650 Sprintall, J. and Revelard, A.: The Indonesian Throughflow response to Indo-Pacific  
651 climate varaibility, Journal of Geophysical Research: Oceans, 119, 1161–1175,  
652 <https://doi.org/10.1002/2013JC009533>.Received, 2014.

653 Tsugawa, M. and Hasumi, H.: Generation and Growth Mechanism of the Natal  
654 Pulse, Journal of Physical Oceanography, 40, 1597–1612, [https://doi.org/10.1175/](https://doi.org/10.1175/2010JPO4347.1)  
655 2010JPO4347.1, 2010.

656 Uppala, S. M., Kallberg, P. W., Simmons, A. J., Andrae, U., Bechtold, V. D. C., Fiorino,  
657 M., Gibson, J. K., Haseler, J., Hernandez, A., Kelly, G. A., Li, X., Onogi, K., Saarinen,  
658 S., Sokka, N., Allan, R. P., Andersson, E., Arpe, K., Balmaseda, M. A., Beljaars, A.  
659 C. M., Berg, L. V. D., Bidlot, J., Bormann, N., Caires, S., Chevallier, F., Dethof,  
660 A., Dragosavac, M., Fisher, M., Fuentes, M., Hagemann, S., Holm, E., Hoskins, B. J.,  
661 Isaksen, L., Janssen, P. A. E. M., Jenne, R., Mcnally, A. P., Mahfouf, J., Morcrette,  
662 J., Rayner, N. A., Saunders, R. W., Simon, P., Sterl, A., Trenberth, K. E., Untch, A.,  
663 Vasiljevic, D., Viterbo, P., and Woollen, J.: The ERA-40 re-analysis, Quarterly Journal  
664 of the Royal Meteorological Society, 131, 2961–3012, <https://doi.org/10.1256/qj.04.176>,  
665 2005.

666 van Sebille, E., Beal, L. M., and Biastoch, A.: Sea surface slope as a proxy for  
667 Agulhas Current strength, Geophysical Research Letters, 37, 2–5, [https://doi.org/](https://doi.org/10.1029/2010GL042847)  
668 10.1029/2010GL042847, 2010.

669 Yan, X. M. and Sun, C.: An altimetric transport index for Kuroshio inflow northeast  
670 of Taiwan Island, Science China Earth Sciences, 58, 697–706, [https://doi.org/10.1007/](https://doi.org/10.1007/s11430-014-5024-z)  
671 s11430-014-5024-z, 2015.

- 672 Yang, H., Lohmann, G., Wei, W., Dima, M., Ionita, M., and Liu, J.: Intensification  
673 and poleward shift of subtropical western boundary currents in a warming climate,  
674 Journal of Geophysical Research: Oceans, 121, 4928–4945, [https://doi.org/10.1002/](https://doi.org/10.1002/2015JC010796)  
675 2015JC010796, 2016.
- 676 Zhu, X. H., Ichikawa, H., Ichikawa, K., and Takeuchi, K.: Volume transport variability  
677 southeast of Okinawa Island estimated from satellite altimeter data, Journal of Ocean-  
678 ography, 60, 953–962, <https://doi.org/10.1007/s10872-005-0004-8>, 2004.
